# Supplementary material
Source: Springer Nature journal article supplement (https://www.springermedizin.de/resource/supplementary/12913_2013_3035_MOESM7_ESM.pdf/9533284)

**Topic:** Salt as bad or vital part of diet

**Quote:** "I think we really need a diet sheet... don't do that or cut right down on them, you know. That would be very helpful if they have a list of things; do and don'ts"

Contains 35% sodium chloride and NaCl of 23% per 100g dry weight  
Constitutes 46% of recommended levels for average adult male

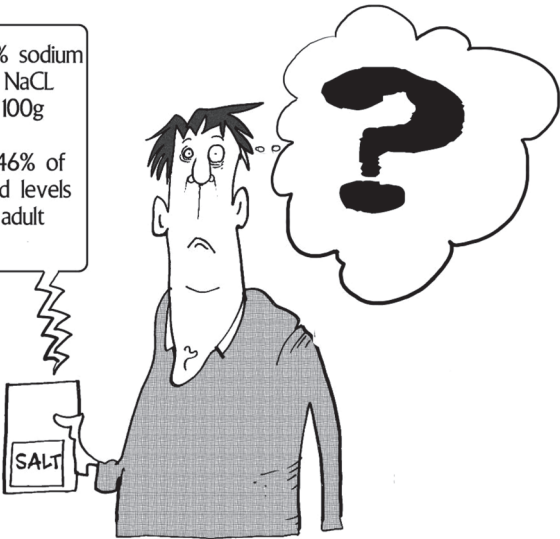

Supplement: MOESM7 [file 9533284]
